# Supplementary material for: Multi-scenario urban flood risk assessment by integrating future land use change models and hydrodynamic models
Source: Copernicus journal article supplement (doi:10.5194/nhess-2021-200), 2021-07-02
Supplement: Supplementary file 1 [file nhess-2021-200-supplement.pdf]

1 *Supplement to* **Multi-scenario urban flood risk assessment by**  
2 **integrating future land use change models and hydrodynamic models**

3 Qinke Sun<sup>1,2</sup>, Jiayi Fang<sup>1,2</sup>, Xuewei Dang<sup>3</sup>, Kepeng Xu<sup>1,2</sup>, Yongqiang Fang<sup>1,2</sup>, Xia Li<sup>1,2</sup>, Min Liu<sup>1,2</sup>

4 <sup>1</sup>School of Geographic Sciences, East China Normal University, Shanghai 200241, China

5 <sup>2</sup>Key Laboratory of Geographic Information Science (Ministry of Education), East China Normal University, Shanghai  
6 200241, China

7 <sup>3</sup>Faculty of Geomatics, Lanzhou Jiaotong University, Lanzhou 730070, China

8

9 *Correspondence to:* Jiayi Fang (jyfang822@foxmail.com); Min Liu (mliu@geo.ecnu.edu.com)

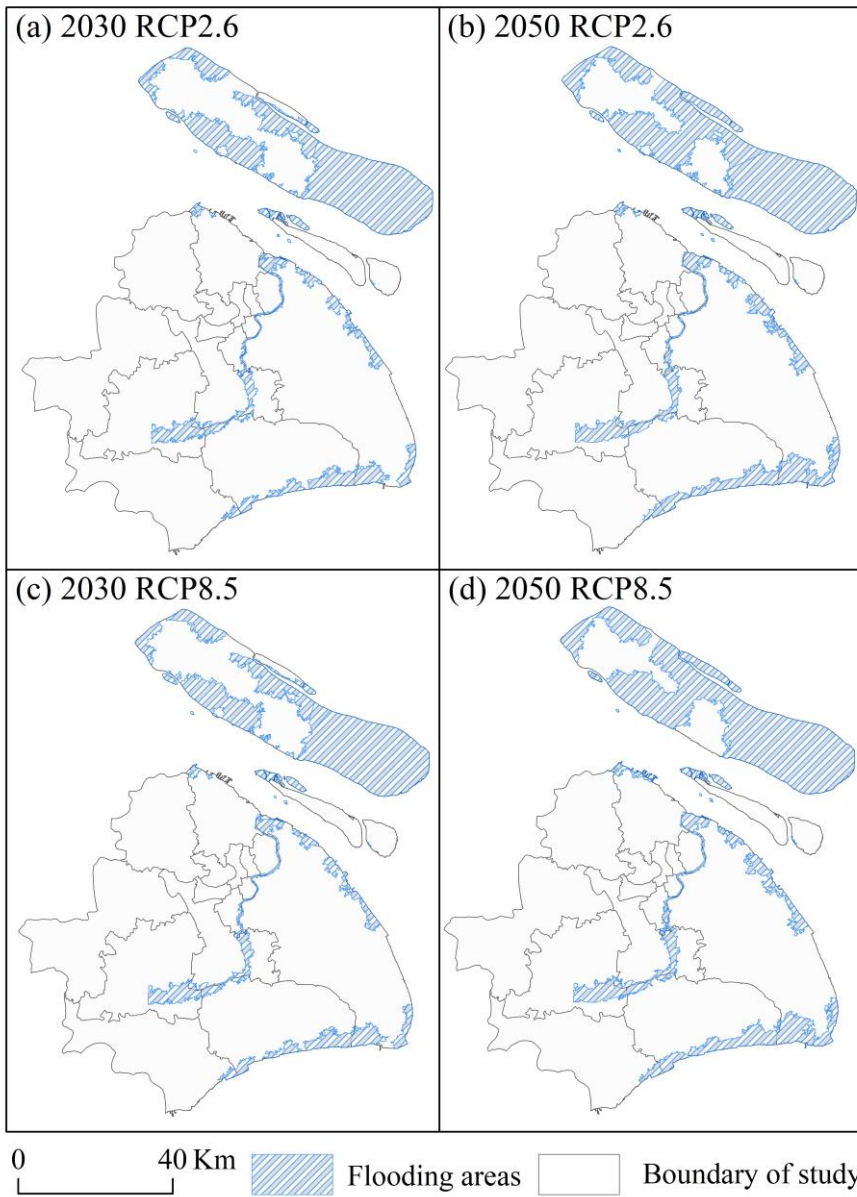

10

11 **Figure S1: The flood inundation in RCP2.6 and RCP8.5 scenarios.**

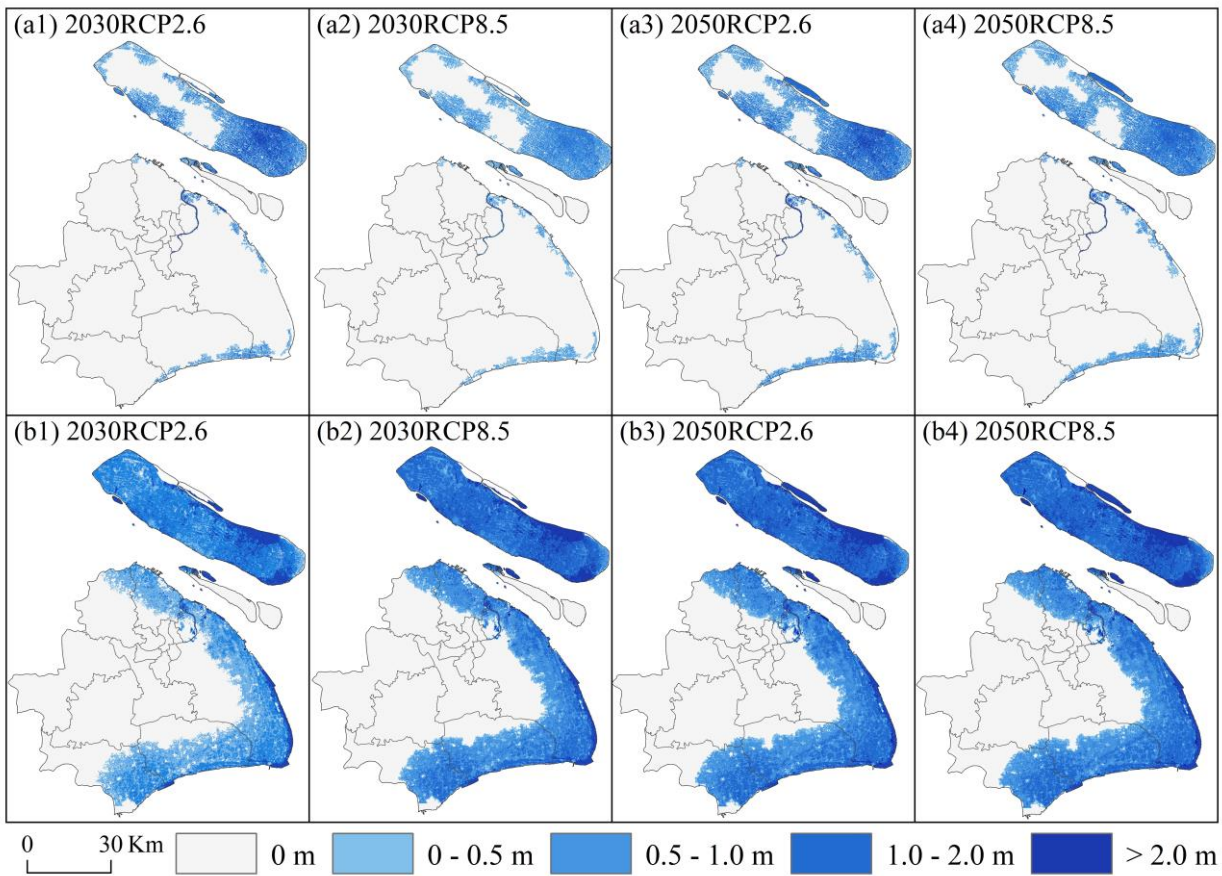

12

13 **Figure S2: Inundation effects of coastal flooding in Shanghai. (a) presents the inundation results under the protection of flood wall,**

14 **(b) presents the inundation results without flood wall.**
