# Supplementary material for: Multi-scenario urban flood risk assessment by integrating future land use change models and hydrodynamic models
Source: Copernicus journal article supplement (doi:10.5194/nhess-2021-200), 2021-07-02
Supplement: Supplementary file [file nhess-2021-200-RC2-supplement.pdf]

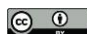

# Multi-scenario urban flood risk assessment by integrating future land use change models and hydrodynamic models

Qinke Sun<sup>1,2</sup>, Jiayi Fang<sup>1,2</sup>, Xuewei Dang<sup>3</sup>, Kepeng Xu<sup>1,2</sup>, Yongqiang Fang<sup>1,2</sup>, Xia Li<sup>1,2</sup>, Min Liu<sup>1,2</sup>

<sup>1</sup>School of Geographic Sciences, East China Normal University, Shanghai 200241, China

<sup>2</sup>Key Laboratory of Geographic Information Science (Ministry of Education), East China Normal University, Shanghai 200241, China

<sup>3</sup>Faculty of Geomatics, Lanzhou Jiaotong University, Lanzhou 730070, China

Correspondence to: Jiayi Fang (jyfang822@foxmail.com); Min Liu (mliu@geo.ecnu.edu.cn)

**Abstract.** Urbanization and climate change are the critical challenges in the 21<sup>st</sup> century. Flooding by extreme weather events and human activities can lead to catastrophic impacts in fast-urbanizing areas. However, high uncertainty in climate change and future urban growth limit the ability of cities to adapt to flood risk. This study presents a multi-scenario risk assessment method that couples the future land use simulation model (FLUS) and floodplain inundation model (LISFLOODFP) to simulate and evaluate the impacts of future urban growth scenarios with flooding under climate change (two representative concentration pathways (RCPs 2.6 and 8.5)). By taking Shanghai coastal city as an example, we then quantify the role of urban planning policies in future urban development to compare urban development under multiple policy scenarios (Business as usual, BU; Growth as planned, GP; Growth as eco-constraints, GE). Geospatial databases related to anthropogenic flood protection facilities, land subsidence, and storm surge are developed and used as inputs to the LISFLOOD-FP model to estimate flood risk under various urbanization and climate change scenarios. The results show that urban growth under the three scenario models manifests significant differences in expansion trajectories, influenced by key factors such as infrastructure development and policy constraints. Comparing the urban inundation results for the RCP2.6 and RCP8.5 scenarios, the urban inundation area under the GE scenario is less than that under the BU scenario, but more than that under the GP scenario. We also find that urban will tend to expand to areas vulnerable to floods under the restriction of ecological environment protection. The increasing flood risk information determined by the coupling model helps to understand the spatial distribution of future flood-prone urban areas and promote the re-formulation of urban planning in high-risk locations.

## 1 Introduction

Climate change and urbanization are the global challenges for the 21<sup>st</sup> century (Peel et al., 2017; Ramaswami et al., 2016; Peel et al., 2017). Floods have been key threats for many cities around the world driven by global climate change (Fang et al., 2020; Hallegatte et al., 2013; IPCC, 2014; Fang et al., 2020). Currently, more than 600 million people worldwide live in the coastal cities that are less than 10 m above sea level (United Nations, 2017a). The United Nations reports that the global population will increase by 29% (7.6 billion) between 2017 and 2050 (United Nations, 2017b), which means that the population of coastal

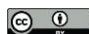

cities will become increasingly concentrated in the future and impervious surfaces will become more numerous (Chen et al., 2020). On the other hand, the National Oceanic and Atmospheric Administration (NOAA) report suggests that global mean sea level will rise around 0.2 m to 2.0 m by 2100 under a continuing global warming trend (Parris et al., 2012). Additionally, properties and populations in many coastal areas will suffer more severely in the future if the effects of land subsidence are taken into account (Voudoukas et al., 2018).

However, high uncertainty in flood risk and urban growth leads to a lack of capacity of cities to respond to the flooding arising from future climate change (Du et al., 2015; Fang et al., 2021; Tessler et al., 2015; Fang et al., 2021). Therefore, there is an urgent need for specialist knowledge and techniques to address the conflict between urbanization and flood risk (Bouwer, 2018; Haynes et al., 2018; Lai et al., 2016; Wang et al., 2015). For example, flood risk studies focus mainly on the current urban scenarios for disaster risk assessment (Bisht et al., 2016; Zhou et al., 2019); and partly consider future land use changes, but urban growth scenarios are mainly limited to original typologies (business-as-usual development) growth scenarios for study (Huong and Pathirana, 2013; Muis et al., 2015), with less consideration of environmental factors and urban growth scenarios under planning constraints (Long and Wu, 2016; Lin et al., 2020; Long and Wu, 2016); thus, the lack of knowledge of future urban development scenarios leads to a lack of awareness of the consequences of future flooding (Kim and Newman, 2020; Zhao et al., 2017; Kim and Newman, 2020). On the other hand, the failure to integrate with broader climate change-related scenarios and possible extreme-case flood risks has led to underinvestment in climate adaptation actions by governments that do not well address the spatial consequences of future floods (Reckien et al., 2018; Berke et al., 2019; Reckien et al., 2018). Thus, there is an urgent need to adopt a more comprehensive approach that considers the complexity of multiple possible scenarios of urbanization and dynamic flood risk in an integrated manner.

This paper uses the coupling of the future land use simulation model (FLUS) and the 2D floodplain inundation model (LISFLOOD-FP) to explore the possible interaction between different urbanization development scenarios and climate change scenarios. The FLUS model improves the simulation accuracy of the model by combining artificial neural network (ANN) and Cellular automata (CA) model to simulate nonlinear land use changes while considering parameters related to environment, society, climate change, etc. (Liu et al., 2017; Zhai et al., 2020). The LISFLOOD-FP model has become a mature hydrodynamic model that can predict potential flood events in near real-time and are widely used in engineering applications (Wing et al., 2019; Sosa et al., 2020; Wing et al., 2019). The coastal metropolitan Area of Shanghai in the Yangtze River Delta in China, one of the fastest urbanizing cities in the world, is used as a case study.

The paper asks, how can combining different urban growth scenarios combined with climate change scenario analysis may help to inform preparedness for flood risks from climate change in urban flood risk assessments? To answer this question, we first consider how urban areas may grow under different environmental and planning factors in the future. Secondly, we coupled urban growth and flood risk scenarios and compared them using climate change scenarios from two representative concentrated pathways (RCP 2.6 and 8.5) proposed by the Intergovernmental Panel on Climate Change (IPCC). The research illustrates the importance of assessing the performance of different future urban development scenarios in response to climate

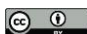

change, and the simulation study of urban risks will prove to decision-makers that incorporating disaster prevention measures into urban development plans will help to reduce disaster losses and improve the ability of urban systems to respond to floods.

## 2 Study area and datasets

### 2.1 Study area

As the alluvial plain of the Yangtze River Delta, Shanghai is located on the coast of the East China Sea between 30°40'–31°53'N and 120°52'–122°12'E, which borders the provinces of Jiangsu and Zhejiang to the West (Fig. 1). It's a typical middle latitude transition belt, marine land transitional zone and also a typical estuarine and coastal city with a fragile ecological environment. The land area of Shanghai is about 6340.50 km<sup>2</sup>, accounting for 0.06 % of the total area of China, and has 213 km of coastlines. The Shanghai metropolitan area has undergone rapid urban expansion in the past decades and has become one of the largest urban areas in the world in both size and population (Sun et al., 2020). However, Shanghai's topography is low, with an average elevation of 4 m above sea level, and there is no natural barrier against storm surges. In 1905, one of the deadliest storm surges occurred in Shanghai, killing more than 29,000 people. Two years later, Typhoon Winnie made landfall in Shanghai, flooded more than 5,000 households (Du et al., 2020). Additionally, due to land subsidence and the increasing frequency and intensity of storm surges, Shanghai will become one of the most sensitive regions due to the global climate change.

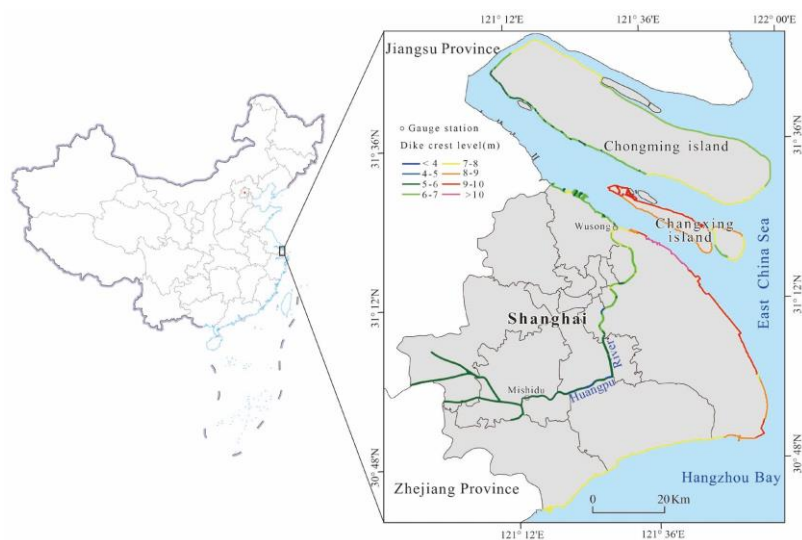



**Figure 1: Location map of the study area. The main inland rivers in Shanghai flow into the East China Sea through the Huangpu River. The line with coloured vectors in the figure indicates the different dike crest level in Shanghai.**

## 2.2 Data

The research used three main categories of data, including basic data, scenarios constraints data and flood simulation data (Table 1). The basic data include land use, topography, traffic network, traffic site, socio-economic data. The land use data with a resolution of 100 m×100 m from the Resource and Environmental Science and Data Center of the Chinese Academy of Sciences is currently the most accurate land use remote sensing monitoring data product in China (Liu et al., 2014). The data for 2005 and 2010 were derived from Landsat-TM/ETM remote sensing image data respectively, and the data for 2015 were interpreted using Landsat 8 remote sensing image. After the data were corrected and visually manually interpreted, the comprehensive evaluation accuracy of the interpretation accuracy of the first-class types of cultivated land, woodland, grassland, water area, urban land, and unused land reached more than 94.30 %, and the discrimination accuracy rate on the map patches reached 98.70 % (Xu et al., 2017). Within the allowable error range, it can be used as the basic data for analyzing land use changes.

Topography factors (DEM, slope), traffic network factors (distance to railway, highway, subway, and main roads), traffic site factors (distance to the city center, train station, and airports) and socio-economic factors (population, GDP), etc. as well as planning constraints, were determined to be spatial influence factors of the flood risk assessment of the Shanghai area. The Advanced Spaceborne Thermal Emission and Reflection Radiometer (ASTER) digital elevation model (DEM), which has 30-meter resolution, served as the basis data for terrain heights and slopes. Traffic network and site were collected from open-source data retrieved from OpenStreetMap (OSM) and POI data were extracted from Tencent Map. Euclidean distance was calculated for all vector data. The data of population and gross domestic product (GDP), were provided by the Resource and Environmental Science and Data Center of the Chinese Academy of Sciences (Xu, 2017a, 2017b), and their time span was consistent with the land use data. According to the simulation forecast demand, all materials were converted into 100 × 100 m grid by resampling. The spatial limiting factors were the basic ecological control line, permanent basic cropland and cultural protection control line as outlined in the 2017–2035 Shanghai City Master Plan. All the impact factor data were normalized, and the range of the value is between 0 and 1 to subsequent data mining.

The storm surge data comes from the Global Tide and Surge Reanalysis (GTSR) dataset, which has been validated to have good accuracy (Muis et al., 2016). In addition, man-made flood defenses have been considered to reasonably evaluate the inundation impact of the flooding. The coastal flood protection data was obtained from the historical archival of the Shanghai Water Authority for Shanghai (Yin et al., 2020). All data sources are listed in in the table below.

**Table 2. Data required and sources. The list details the resolution and sources of the data in the study.**

| Category | Data Type | Resolution | Source |
|----------|-----------|------------|--------|
|----------|-----------|------------|--------|

Formatiert: Englisch (USA)



|                          |                                          |              |                                                                                                                    |
|--------------------------|------------------------------------------|--------------|--------------------------------------------------------------------------------------------------------------------|
| Basic data               | Land use                                 | 100 m × 100m | Resource and Environmental<br>Science and Data Center<br>( <a href="http://www.resdc.cn">http://www.resdc.cn</a> ) |
|                          | Topography                               | Vector line  | ASTER GDEM<br>( <a href="https://earthexplorer.usgs.gov/">https://earthexplorer.usgs.gov/</a> )                    |
|                          | Traffic network                          | Vector line  | OpenStreetMap<br>( <a href="https://www.openstreetmap.org">https://www.openstreetmap.org</a> )                     |
|                          | Traffic site                             | Vector point | Tencent Map ( <a href="https://map.qq.com/">https://map.qq.com/</a> )                                              |
|                          | Social economy                           | 1 km × 1 km  | Resource and Environmental<br>Science and Data Center                                                              |
| Scenarios<br>constraints | Ecological control<br>line               | Vector line  | 《2017-2035 Shanghai City Master<br>Plan》                                                                           |
|                          | Permanent basic<br>cropland control line | Vector line  |                                                                                                                    |
|                          | Cultural protection<br>control line      | Vector line  |                                                                                                                    |
| Flood data               | Floodwalls                               | Vector line  | Shanghai Water Authority<br>( <a href="http://swj.sh.gov.cn/">http://swj.sh.gov.cn/</a> )                          |
|                          | Storm surge                              | Vector line  | GTSR                                                                                                               |

### 3 Methodology

The presented approach for relative sea level rise scenario flood risk assessment is the integration of the FLUS model, LISFLOOD-FP model, and Markov chain model. In the framework, the FLUS model and Markov chain model are designed to stimulate complexity land-use change processes in three different scenarios through 2030 to 2050, which include Business as usual (BU), Growth as planned (GP), Growth as eco-constraints (GE) scenarios. A Markov chain model is used to predict land-use demand in 2030 and 2050, combining planning policy factors, which is one of the crucial data inputs in the FLUS model. Next, the LISFLOOD-FP two-dimensional flood model is used to explore the potential flooding areas under the RCP 2.6 and 8.5 scenarios in 2030 and 2050, to avoid the overestimation of the submerged range based on the GIS-based elevation area method. This model also considers the compound influence of sea-level rise, storm surge, and land subsidence. Finally, via ArcGIS spatial comprehensive analysis, the flooding of different land types is calculated employing different flooding scenarios. The overall flow chart of research is illustrated in Fig. 2.

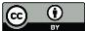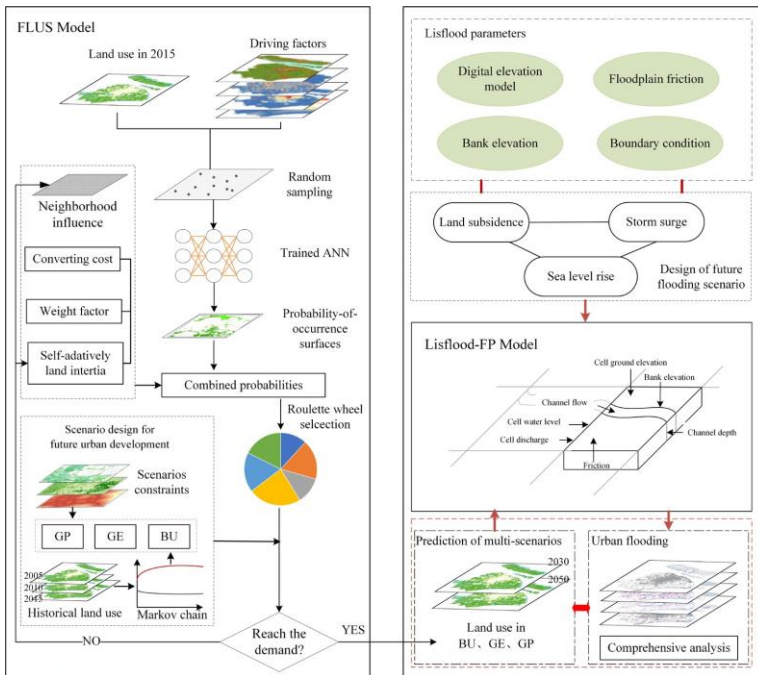

Figure 2: The overall flow chart of research.

### 3.1 Markov chain model

Markov chain model refers to the random transition process of state from one state to another, and its future state is only related to the state at previous moment. In the study of land use change, the type of land use at a certain moment is only related to the type of land use at the previous moment. Therefore, land-use change is a typical Markov process and has widely used in the prediction of land-use changes (Zhou et al., 2020). We predicted future land use by Eq. (1):

$$SS_{(t+1)} = PP_{i,j} \times SS_t \quad (1)$$

where  $S_t$  and  $S_{t+1}$  represent the land use at times  $t$  and  $t+1$ , and  $P_{i,j}$  is a state transition matrix that land-use type  $i$  is converted to land-use type  $j$ . This model has a good predictive effect on the process state (Gounaridis et al., 2019). Therefore, we use the Markov chain to calculate the probability of the conversion of various land types, and then predict the number of future land changes.

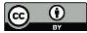

### 3.2 The FLUS land use simulation model

The FLUS model is an upgraded version of a cellular automata model (CA-model, Liu et al., 2017), which can solve the complex land use simulation problems by self-adaptive inertia and competition mechanism. The FLUS shows the highest current performances than other simulation models such as CLEU-S, SLEUTH, and LTM and has been applied to land use change simulation research at different scales and for different purposes (Liang et al., 2018; Lin et al., 2020).

As the most important scheme to manage the space of the urban area, an urban land use plan can reflect the general arrangement of land use in the future (Xu and Yang, 2019). In this research, three categories of urban growth scenarios are simulated through the FLUS model. The similarity of the three scenarios is that they use factors that affect urban development and changes, such as population, GDP, traffic, and slope, as the main spatial driving factors. The differences are as follows:

- (i) Business as usual (BU): BU is natural growth without development laws and regulations. Its development is based on the premise of the current urban development patterns. Therefore, the land demand predicted by Markov is used as the constraint condition for the iteration of CA model in the subsequent application of the scenario.
- (ii) Growth as planned (GP): Under the GP scenario, the urban growth projection that closely link to the master plan for Shanghai in terms of quantity, reflecting how the city government prefer to develop. The master plan requires that the total area of planned urban construction land does not exceed 3,200 km<sup>2</sup> in 2035. As the condition for the model iteration to stop, we estimated the urban area to be 2,768 km<sup>2</sup> in 2030 and 3,200 km<sup>2</sup> in 2050 combined with the urban master plan.
- (iii) Growth as eco-constraints (GE): The GE scenario is an eco-environmental protection scenario, where the development is limited by the ecological environment protection. Combined with Shanghai's ecological and environmental protection requirements and the distribution of permanent basic farmland, sensitive areas restricted for development are identified at the scenario, and we also establish a cultural protection control line for strengthening historical and cultural protection. In addition, the number of areas of future urban growth in the GE scenario also combines the requirements given in the urban master plan to enhance the reality of the scenario.

Therefore, the FLUS model is used to simulate future urban growth combines various scenarios. First, the driving factors and land-use data are trained by an ANN model to obtain a probability-of-occurrence map, and then incorporate with the selfadaptive land inertial, conversion cost, and neighborhood competition among the different land use types to estimate the combined probability for each grid. Next, combining the number of various types of land predicted by the Markov Chain model and considering the constraints of each scenario to predicted urban growth in 2030 and 2050. To better validate the model before predicting future change, we compared the output with the actual land use 2015. Note that the number of iterations in each scenario is set to 5000, which is much higher than the default value to show higher prediction accuracy.

### 3.3 The LISFLOOD-FP flood inundation model

LISFLOOD-FP is a 2D hydraulic model based on a raster grid (Bates et al., 2010), which can efficiently simulate the dynamic propagation of flood waves over fluvial and estuarine floodplains and show real-time changes in water depth of complex



terrain. LISFLOOD-FP model solves the Saint-Venant equations at very low computational cost by omitting only the convective acceleration term over a structured grid using a highly efficient explicit finite difference scheme to produce a two-dimensional simulation of floodplain hydrodynamics (O'Loughlin et al., 2020). The model has been widely used in the applications of small-scale and large-scale urban waterlogging and flooding.

In the present study, the LISFLOOD-FP model is used to simulate storm surge floods along the coast of Shanghai and floods along the Huangpu River. The effectiveness of the model in the study area has been verified by another article of our group members and shows good simulation results (Xu et al., 2021). In the boundary control of model, hydrological stations and global storm surge data are respectively employed as the input of the scenario design. However, Shanghai Geological Environmental Bulletin and land subsidence control plan show that land subsidence has a significant contribution to the flood hazards in Shanghai (Xian et al., 2018). With reference to the research of Yin et al. (Yin et al., 2013), the values of land subsidence in 2030 and 2050 are selected to be 0.12 m and 0.24 m, respectively. This study also combines the storyline of future scenarios of the IPCC, namely the Representative Concentration Pathway (RCP) scenarios, and selects conservative (RCP2.6) and largest magnitude (RCP8.5) climate-change scenarios, which values from Kopp et al. (Kopp et al., 2017). For the simulation of the Huangpu River flood, we conducted experiments for a 50-year return period under the RCP2.6 scenario and a 100-year return period under the RCP8.5 scenario respectively during 2030 to 2050. For the 2030 and 2050, both Huangpu River and the coastal floods are following the RCP2.6 and RCP8.5 scenarios. Finally, we combine land subsidence and the RCP data to control the flood inundation simulation.

## 4 Results

### 4.1 Model validity

Model verification is the prerequisite for model operation, and the operation can only be carried out after confirming the model to be valid. The applicability of the proposed model was tested by simulating LUCCs in 2015 at Shanghai. The spatial simulation result shows that the simulated result and the actual land use have a high consistency (Fig. 3). We compared the actual land use and the simulated result pixel by pixel in our study and found the overall accuracy (OA) was 93.20%, the kappa coefficient (kappa) was 0.89. The discrepancy of the actual land use and simulated result is likely due to the neighborhood interaction in the CA model, in which grid cells in more urbanized neighborhoods have a higher probability to convert to urban, whereas the grid cells are less likely to change to urban in less urbanized neighborhoods. Overall, the measured model accuracy outputs are measured showed an acceptable or good level of prediction, therefore the model is suitable for predicting changes in land use of the Shanghai area.



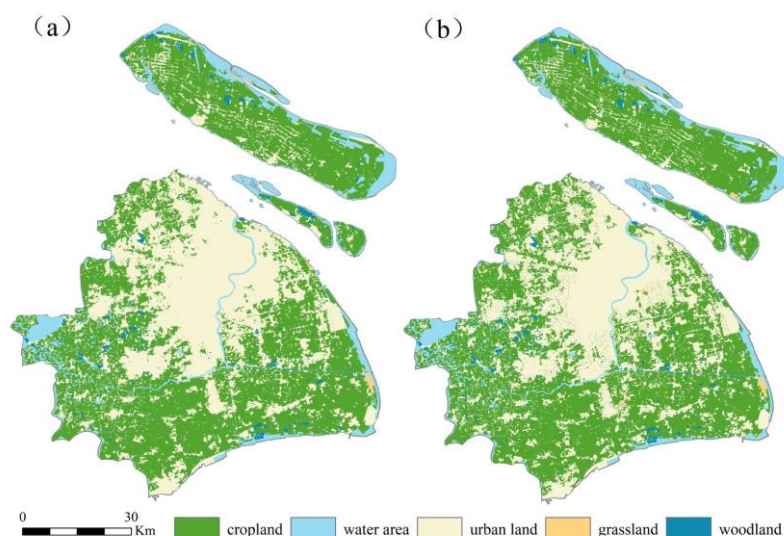

**Figure 3: Comparing the simulation results of Shanghai urban expansion with the actual situation, (a) simulation result in 2015; (b) actual land use in 2015.**

#### 4.2 Future land use changes

Based on the conditions under three different development scenarios, we predicted the development of future urban land use change in 2030 and 2050. The prediction result shows different development patterns for each scenario (Fig. 4). Future urban growth under the BU scenario is primarily located in northwestern with some development in the central regions, and under the GP scenario the urban growth involves evenly distributed development. Urban growth in the GE scenario, however, Chongming Island regions have seen more urban growth, and the downtown area is not fully occupied by urban expansion due to restrictions.

Due to the impact of infrastructure construction, distance to the city center, and policy restrictions, Shanghai's overall urban expansion model shows a center-peripheral expansion. The built-up land areas in 2030 and 2050 are respectively projected to increase by about 6 % and 13 % as compared to 2015, the most significant reduction is found for cultivated land and woodland. Specifically, the built-up land areas in 2030 are respectively projected to increase by 427.32 km<sup>2</sup>, 428.27 km<sup>2</sup> and 429.12 km<sup>2</sup> at BU, GP and GE scenarios, the built-up land areas in 2050 are respectively projected to increase by 926.38 km<sup>2</sup>, 857.63 km<sup>2</sup> and 751.47 km<sup>2</sup> at BU, GP and GE scenarios. The most significant reduction is found for cropland, which is predicting in 2050 to decrease by 876.97 km<sup>2</sup>, 857.63 km<sup>2</sup> and 723.59 km<sup>2</sup> as compared to 2015 in BU, GP and GE scenarios. The southwestern

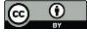

Formatiert: Schriftfarbe: Rot

region is not suitable for large-scale urban development, ~~since~~ due to large amounts of farmland in the region are listed as ecological protection areas, so the slow growth of these areas is not expected. The simulation maps show, as expected, land use changes under different planning scenarios, especially the urban sprawl trend at the GE scenario, creating new development areas in suburbs. To sum up, the urban expansion trajectory under BU, GP and GE shows significant differences, and these changes mainly at the expense of the cropland.

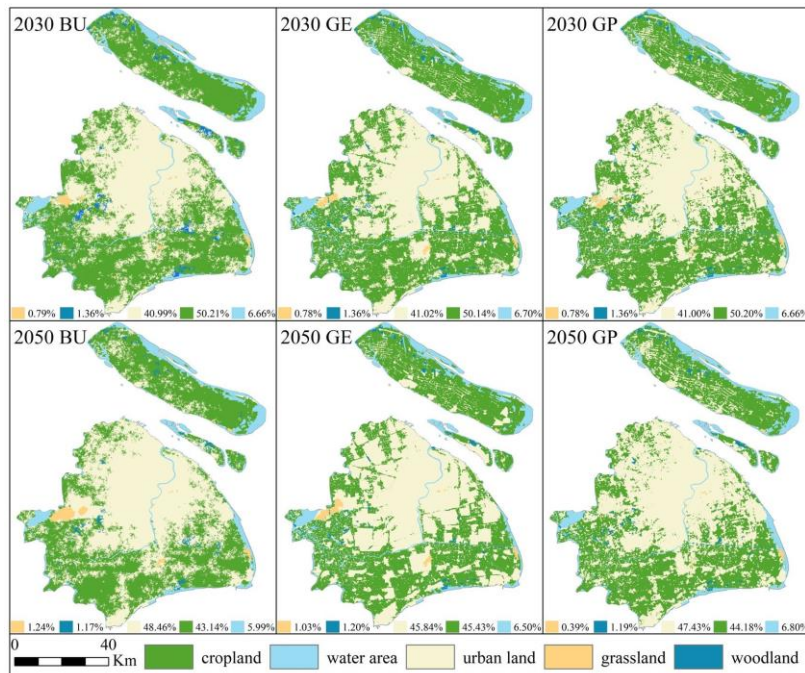

Formatiert: Englisch (USA)

Formatiert: Schriftfarbe: Rot, Englisch (USA)

comes before GE..., would avoid confusion...

**Figure 4:** Simulation results of different scenarios in 2030 (top) and 2050 (bottom). Each image shows the spatial distribution and the proportion of area of different land use types in the simulated scenario.

### 4.3 Changing flood hazard in the future

The LISFLOOD-FP model is used to simulate the flood evolution process under RCP2.6 and RCP8.5 scenarios (the inundation results are plotted in Supplementary Figure 1), and then the submerged depth and area under different scenarios are statistically analyzed to explore the future flood risk under different RCP scenarios. First, the maximum water depth risk of the submerged

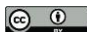

area is counted, and the submerged area is divided into four depth levels: the submerged water depth is less than 0.5 m as shallow water area, water depth is 0.5-1 m as medium water area, the water depth is 1-2 m as deep water area, and submerged water depth is above 2 m as the extremely deep area. The area and proportion of each water depth level are calculated. By comparing the scenarios in RCP2.6 and RCP8.5, it is evident that the submerged area ~~is~~ increasing ~~trends~~ with time (Table 2). The total flooded area increased by 162.43 km<sup>2</sup> and 189.44 km<sup>2</sup> under RCP2.6 and RCP8.5 scenarios from 2030 to 2050, respectively. Additionally, the depth of submergence and the extent of submergence will gradually increase as the floodwater spreads. Taking the area with submergence depth above 2 m as an example, under RCP2.6 scenario the area with submergence is 353.69 km<sup>2</sup> and 401.57 km<sup>2</sup> respectively in 2030 and 2050, and under RCP8.5 scenario the area with submergence is 356.28 km<sup>2</sup> and 418.36 km<sup>2</sup> respectively in 2030 and 2050. It shows that Shanghai will still face great flood risk under these two scenarios.

**Table 2. Statistics of flood water depth.**

| y              | <0.5 m                   |             | 0.5-1 m                  |             | 1-2 m                    |             | >2 m                     |             | /km <sup>2</sup> | Category | Total |
|----------------|--------------------------|-------------|--------------------------|-------------|--------------------------|-------------|--------------------------|-------------|------------------|----------|-------|
|                | Area/<br>km <sup>2</sup> | Ratio/<br>% | Area/<br>km <sup>2</sup> | Ratio/<br>% | Area/<br>km <sup>2</sup> | Ratio/<br>% | Area/<br>km <sup>2</sup> | Ratio/<br>% |                  |          |       |
| 2030<br>RCP2.6 | 138.61                   | 14.54       | 164.07                   | 17.21       | 296.98                   | 31.15       | 353.69                   | 37.10       | 953.35           |          |       |
| 2030<br>RCP8.5 | 137.13                   | 14.23       | 169.76                   | 17.61       | 300.82                   | 31.21       | 356.28                   | 36.96       | 963.99           |          |       |
| 2050<br>RCP2.6 | 125.04                   | 11.21       | 229.81                   | 20.60       | 359.36                   | 32.21       | 401.57                   | 35.99       | 1115.78          |          |       |
| 2050<br>RCP8.5 | 141.72                   | 12.29       | 219.58                   | 19.04       | 373.77                   | 32.41       | 418.36                   | 36.27       | 1153.43          |          |       |

#### 4.4 Future changes in urban flood risk

The flood risk of the urban area is calculated by overlapping existing urban and projected future urban scenarios with future flood risk zones. First, in the existing urban exposure to future flood risk scenarios (the upper left in Fig. 5), more urban areas will be vulnerable to flood risk in the context of global climate change. Under the RCP 2.6 scenario, 4.68 % and 5.96 % of the total existing urban areas in 2030 and 2050 would be susceptible to flood risk, respectively. In the 2030 and 2050 of the RCP8.5 scenarios the area of existing urban land which would be vulnerable to future flood risks are 110.27 km<sup>2</sup> and 146.23 km<sup>2</sup>, respectively. Many urban areas will be flooded under sea level rise caused by climate change even when protected by levees, and more than 5 % of urban areas in Shanghai are still in the floodplain.

Formatiert: Englisch (USA)

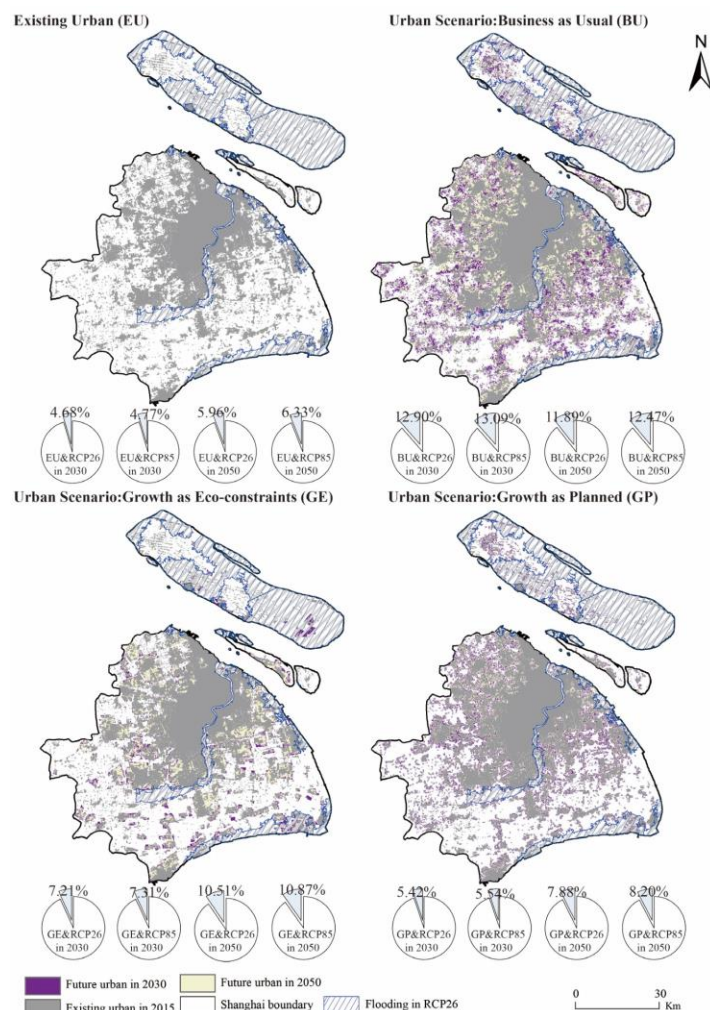

**Figure 5: Flood exposure of existing urban and future urban growth scenarios. The four pie charts for the BU, GE, and GP scenarios represent the proportion of new growth urban areas exposed to flooding under the 2030RCP2.6, 2030RCP8.5, 2050RCP2.6, and 2050RCP8.5 scenarios, respectively. The four pie charts for the EU scenarios represent the proportion of the existing urban area affected by the future flood risk scenario.**



Future urban development would occur in the flood zone, with ~~at~~ the rapid expansion of the urban ~~area~~. Fig. 5 also shows the comprehensive analysis results of the three urban growth scenarios under different climate change scenarios. Under the RCP2.6 scenario, new growth in urban land area affected by flooding in 2030 are respectively 55.11 km<sup>2</sup>, 23.22 km<sup>2</sup>, and 30.92 km<sup>2</sup> at BU, GP and GE scenarios. Under the RCP8.5 scenario, future more urban growth areas would be affected by the flooding, which will ~~be reached~~ 12.47 %, 10.87 %, and 8.20 % at BU, GP and GE scenarios in 2050, respectively. In general, the higher the sea level rises, the greater the risk of flooding in future urban areas. Small changes in sea level rise will affect a large amount of land, ~~since due to~~ the average altitude of Shanghai is ~~only~~ around 4 m ~~a.s.l.~~

**Table 3. Inundate~~ion~~ of each land use type under different scenarios. The inundated areas of different land use types, including cropland, woodland, grassland and urban land, were calculated for each scenario, where <sup>a</sup> indicates new growth~~ing~~ areas of ~~the~~ urban class affected by flooding.**

| Time | Category | Urban scenario | Inundated areas (km <sup>2</sup> ) |          |           |                         |
|------|----------|----------------|------------------------------------|----------|-----------|-------------------------|
|      |          |                | Cropland                           | Woodland | Grassland | Urban land <sup>a</sup> |
| 2030 | RCP2.6   | BU             | 595.05                             | 10.05    | 5.60      | 55.11                   |
|      |          | GE             | 618.95                             | 12.12    | 5.84      | 30.92                   |
|      |          | GP             | 597.71                             | 12.40    | 5.91      | 23.22                   |
|      | RCP8.5   | BU             | 602.38                             | 10.23    | 5.67      | 55.92                   |
|      |          | GE             | 625.97                             | 12.29    | 5.91      | 31.23                   |
|      |          | GP             | 604.32                             | 12.59    | 5.98      | 23.72                   |
| 2050 | RCP2.6   | BU             | 662.64                             | 13.56    | 5.25      | 110.19                  |
|      |          | GE             | 677.59                             | 16.74    | 5.95      | 78.95                   |
|      |          | GP             | 651.24                             | 15.66    | 5.46      | 67.55                   |
|      | RCP8.5   | BU             | 683.56                             | 15.06    | 5.70      | 115.53                  |
|      |          | GE             | 698.98                             | 18.05    | 6.40      | 81.71                   |
|      |          | GP             | 672.30                             | 16.85    | 5.91      | 70.36                   |

The research found that the cultivated land is most affected by flooding (Table 3), and urban areas and woodland are the second most affected. Under the GE scenario, the flooded area of cultivated land is 618.95 km<sup>2</sup> and 625.97 km<sup>2</sup> at the RCP2.6 and RCP8.5 in 2030, and 677.59 km<sup>2</sup> and 698.98 km<sup>2</sup> at the RCP2.6 and RCP8.5 in 2050. Further, the exposure of various types of land is increasing with time, but urban land and cropland will be the most impacted land types in the future. Comparing the

Formatiert: Englisch (USA)

Formatiert: Englisch (USA)



three scenarios we can find that the urban development area under the planning scenario is less affected by flooding, as compared to the business-as-usual development scenario. Comparing the inundation of the two planning scenarios (GE and GP), it also reflects the decision-makers' trade-off between economic development and ecological protection. The inundation area of the urban land under the GP scenario is less than that of the GE, which means that under the planning constraint of protecting ecological and cultural areas, urban built-up areas will develop on low-protection areas, which are more vulnerable to flooding. In conclusion, from reducing the risk of future flooding in urban areas, GE scenario shows to be better than BU scenario, but worse than GP scenario.

## 5 Discussions

### 5.1 Source of uncertainties

There are some limitations in our study, which is what we need to improve in the future. First, there is still more room to improve the accuracy of model prediction. In this study, the performance of the FLUS model is tested by kappa and OA measures, which shows a good range of prediction accuracy. In addition, this study proves that 16 driving factors contribute to the simulation and prediction of urban growth in Shanghai. The relationship between human and natural driving factors and land use change can be effectively integrated through the FLUS model embedded with an ANN, to obtain more realistic simulation results. However, if more influential drivers and the latest land cover are employed, the prediction would be having higher accuracy. Second, future flood risks in coastal areas are also not fully reflected through the use of hydrodynamic models, although it shows higher accuracy than the elevation area submergence method. On the one hand, this study is based on the modeling results of DEM data, which may overestimate or underestimate the simulation effect due to the error of DEM data. On the other hand, extreme storm surge and land subsidence data are combined to enhance the reliability of the extreme flood forecast in this study. However, the change of the impervious surface that affects hydrology is not yet considered in this study. When other land uses are converted to urban land uses, the risk of flooding will also greatly increase due to changes in impervious surfaces. Therefore, it is necessary to dynamically adjust relevant factors affecting flood peak flows and risk in future forecasts to enhance the accuracy of prediction.

In the context of global climate change, extreme weather in the future may become more and more serious, so it is necessary to dynamically combine climate scenarios to develop more accurate flood risk delineation methods to guide urban planning in the future, and rely on new technology and equipment to provide data support. For example, unmanned aviation vehicles (UAVs) are deployed around the coastline to generate real-time information about weather conditions and sea-level changes (Cochrane et al., 2017). These tools will act as a complement to existing information and early warning systems, which also can provide guidance for coastal flood risk management and urban planning in the future. Overall, although uncertainty cannot be avoided when assessing coastal flood risk, the deviation of the proposed model output is within an acceptable range, which ensures the accuracy of coastal flood risk assessments.



## 5.2 Recommendations on strategies and policies for urban adaptation to flooding

In the twenty-first century, adapting to climate change and coastal flooding is a critical challenge for coastal cities. Human response to the impacts of flooding largely depends on the allocation of urban facilities and managers' planning for future urban development (Hunt and Watkiss, 2011). Shanghai is considered one of the most protected Chinese cities in terms of flood protection, yet it's the EAD/GDP (the Expected Annual Disruption, EAD), that is the direct damage to buildings and vehicles) ratio, which is as much as five times than in New York (Aerts et al., 2014). Therefore, there is an urgent need to adopt flood risk adaptation strategies in Shanghai.

We conducted a set of comparative experiments to analyze the coastal flood damage in Shanghai with and without flood walls (hard adaptation strategies). Our analysis considered the important effects of land subsidence and sea level riseSLR on flood risk. We found that the current flood protection wall can reduce the flood losses due to climate change to a relatively low level (Supplementary Figure 2). In comparison, the flood protection wall constructed for the current conditions would reduce the flooded area under the RCP8.5 scenario by about 35 % and 36 % in 2030 and 2050, respectively. This result shows that the current hard protection strategy can reduce the flood risk to a low level, but the residual flood risk from using the hard protection strategies still needs to be addressed. From the cases of advanced flood risk management countries such as the Netherlands (Kabat et al., 2009; Song et al., 2018), an important success lesson for future flood protection design is to leave enough space along coasts for wetland migration and leave space for nature. In other words, "soft strategies" such as "working with rivers and nature" are considered in the flood protection measures. Therefore, it is necessary to learn from the practical experience of advanced countries to strengthen the development and construction of coastal wetlands and tidal flat ecosystems, and further reduce the residual risk through the adaptive regulation of coastal ecosystems and other soft strategies. In addition, the implementation of "soft strategies" can increase the value of ecosystem services, increase biodiversity and carbon sequestration, and improve social welfare (Du et al., 2020).

## 6 Conclusion

Scenario-based assessment has been found to be a powerful approach in numerous flood risk studies. This study combines an urban growth model with a two-dimensional flood inundation model to not only simulate urban development dynamics more accurately, but also to discard the shortcomings of the traditional elevation inundation method of overestimating inundation areas. We have also tested the resilience of Shanghai to future different climate scenarios with the current flood wall. The results of the study are beneficial to local planners and coastal managers in making decisions of future protected areas and developments.

This study employed three urban development scenarios and detected the relationships of urbanization and climate changes in 2030 and 2050. The results of the study show that urban growth under the three scenario models manifests significant differences in expansion trajectories, influenced by key factors such as infrastructure development and policy constraints.





According to the predicted results of flood, new built-up areas are also potentially vulnerable areas of flood risk. New built-up areas under different scenarios show significant vulnerability and exposure risk under different climate scenarios, even with the support of flood bank and other hard structures. Additionally, the research provided significant insights into the range and spatial distribution of flood risk in future urban areas.

The current study is based on the multi scenario analysis of RCP global warming scenarios. In the future, the shared socioeconomic pathways (SSPs) can be combined to predict land use change, which make urban development scenarios have more realistic choices. The results of this study estimate the future urban flood exposure areas, but this does not mean that all flood-vulnerable areas will be flooded, only that in these areas, the probability of each possible occurrence is greater. Therefore, proper preparations (such as definition restricted development zones) can reduce the damage risk of future flood and build more resilient cities.

#### Author contributions

Q. Sun and J. Fang designed the research; Q. Sun, K. Xu and X. Dang collected the data and carried out the experiments; Q. Sun wrote the draft; J. Fang, X. Dang, Y. Fang and M. Liu revised the manuscript; J. Fang, X. Li and M. Liu supervised and provided critical feedback. All authors contributed to the final version of the manuscript.

#### Competing interests

The authors declare that they have no conflict of interest.

#### Funding source

This work was supported by a grant from the National Natural Science Foundation of China (No.42001096); Shanghai Sailing Program (19YF1413700); China Postdoctoral Science Foundation (No. 2019M651429).

#### References

- Aerts, J. C. J. H., Botzen, W. J. W., Emanuel, K., Lin, N., De Moel, H. and Michel-Kerjan, E. O.: Climate adaptation: Evaluating flood resilience strategies for coastal megacities, *Science* (80-. ), 344(6183), 473–475, doi:10.1126/science.1248222, 2014.
- Bates, P. D., Horritt, M. S. and Fewtrell, T. J.: A simple inertial formulation of the shallow water equations for efficient twodimensional flood inundation modelling, *J. Hydrol.*, 387(1–2), 33–45, doi:10.1016/j.jhydrol.2010.03.027, 2010.





- Berke, P. R., Malecha, M. L., Yu, S., Lee, J. and Masterson, J. H.: Plan integration for resilience scorecard: evaluating networks of plans in six US coastal cities, *J. Environ. Plan. Manag.*, 62(5), 901–920, doi:10.1080/09640568.2018.1453354, 2019.
- Bisht, D. S., Chatterjee, C., Kalakoti, S., Upadhyay, P., Sahoo, M. and Panda, A.: Modeling urban floods and drainage using SWMM and MIKE URBAN: a case study, *Nat. Hazards*, 84(2), 749–776, doi:10.1007/s11069-016-2455-1, 2016.
- Bouwer, L. M.: Next-generation coastal risk models, *Nat. Clim. Chang.*, 8(9), 765–766, doi:10.1038/s41558-018-0262-2, 2018.
- Chen, G., Li, X., Liu, X., Chen, Y., Liang, X., Leng, J., Xu, X., Liao, W., Qiu, Y., Wu, Q. and Huang, K.: Global projections of future urban land expansion under shared socioeconomic pathways, *Nat. Commun.*, 11(1), 537, doi:10.1038/s41467020-14386-x, 2020.
- Cochrane, L., Cundill, G., Ludi, E., New, M., Nicholls, R. J., Wester, P., Cantin, B., Murali, K. S., Leone, M., Kituyi, E. and Landry, M. E.: A reflection on collaborative adaptation research in Africa and Asia, *Reg. Environ. Chang.*, 17(5), 1553–1561, doi:10.1007/s10113-017-1140-6, 2017.
- Du, S., Van Rompaey, A., Shi, P. and Wang, J.: A dual effect of urban expansion on flood risk in the Pearl River Delta (China) revealed by land-use scenarios and direct runoff simulation, *Nat. Hazards*, 77(1), 111–128, doi:10.1007/s11069-014-1583-8, 2015.
- Du, S., Scussolini, P., Ward, P. J., Zhang, M., Wen, J., Wang, L., Koks, E., Diaz-Loaiza, A., Gao, J., Ke, Q. and Aerts, J. C. J. H.: Hard or soft flood adaptation? Advantages of a hybrid strategy for Shanghai, *Glob. Environ. Chang.*, 61, 102037, doi:https://doi.org/10.1016/j.gloenvcha.2020.102037, 2020.
- Fang, J., Lincke, D., Brown, S., Nicholls, R. J., Wolff, C., Merken, J. L., Hinkel, J., Vafeidis, A. T., Shi, P. and Liu, M.: Coastal flood risks in China through the 21st century – An application of DIVA, *Sci. Total Environ.*, 704, 135311, doi:10.1016/j.scitotenv.2019.135311, 2020.
- Fang, J., Wahl, T., Zhang, Q., Muis, S., Hu, P., Fang, J., Du, S., Dou, T. and Shi, P.: Extreme sea levels along coastal China: uncertainties and implications, *Stoch. Environ. Res. Risk Assess.*, 35(2), 405–418, doi:10.1007/s00477-020-01964-0, 2021.
- Gounaridis, D., Chorianopoulos, I., Symeonakis, E. and Koukoulas, S.: A Random Forest-Cellular Automata modelling approach to explore future land use/cover change in Attica (Greece), under different socio-economic realities and scales, *Sci. Total Environ.*, 646, 320–335, doi:10.1016/j.scitotenv.2018.07.302, 2019.
- Hallegatte, S., Green, C., Nicholls, R. J. and Corfee-Morlot, J.: Future flood losses in major coastal cities, *Nat. Clim. Chang.*, 3(9), 802–806, doi:10.1038/nclimate1979, 2013.
- Haynes, P., Hehl-Lange, S. and Lange, E.: Mobile Augmented Reality for Flood Visualisation, *Environ. Model. Softw.*, 109, 380–389, doi:10.1016/j.envsoft.2018.05.012, 2018.
- Hunt, A. and Watkiss, P.: Climate change impacts and adaptation in cities: A review of the literature, *Clim. Change*, 104(1), 13–49, doi:10.1007/s10584-010-9975-6, 2011.



- 383 Huong, H. T. L. and Pathirana, A.: Urbanization and climate change impacts on future urban flooding in Can Tho city, Vietnam,  
 384 Hydrol. Earth Syst. Sci., 17(1), 379–394, doi:10.5194/hess-17-379-2013, 2013.
- 385 IPCC: Climate Change 2014: Impacts, Adaptation, and Vulnerability. Part A: Global and Sectoral Aspects. Contribution of  
 386 Working Group II to the Fifth Assessment Report of the Intergovernmental Panel on Climate Change, Cambridge  
 387 University Press, Cambridge, UK., 2014.
- 388 Kabat, P., Fresco, L. O., Stive, M. J. F., Veerman, C. P., van Alphen, J. S. L. J., Parmet, B. W. A. H., Hazeleger, W. and  
 389 Katsman, C. A.: Dutch coasts in transition, Nat. Geosci., 2(7), 450–452, doi:10.1038/ngeo572, 2009.
- 390 Kim, Y. and Newman, G.: Advancing scenario planning through integrating urban growth prediction with future flood risk  
 391 models, Comput. Environ. Urban Syst., 82, 101498, doi:https://doi.org/10.1016/j.compenvurbsys.2020.101498, 2020.
- 392 Kopp, R. E., DeConto, R. M., Bader, D. A., Hay, C. C., Horton, R. M., Kulp, S., Oppenheimer, M., Pollard, D. and Strauss, B.  
 393 H.: Evolving understanding of Antarctic ice-sheet physics and ambiguity in probabilistic sea-level projections, arXiv,  
 394 2017.
- 395 Lai, C., Shao, Q., Chen, X., Wang, Z., Zhou, X., Yang, B. and Zhang, L.: Flood risk zoning using a rule mining based on ant  
 396 colony algorithm, J. Hydrol., 542, 268–280, doi:https://doi.org/10.1016/j.jhydrol.2016.09.003, 2016.
- 397 Liang, X., Liu, X., Li, X., Chen, Y., Tian, H. and Yao, Y.: Delineating multi-scenario urban growth boundaries with a CA-  
 398 based FLUS model and morphological method, Landsc. Urban Plan., 177, 47–63, doi:10.1016/j.landurbplan.2018.04.016,  
 399 2018.
- 400 Lin, W., Sun, Y., Nijhuis, S. and Wang, Z.: Scenario-based flood risk assessment for urbanizing deltas using future land-use  
 401 simulation (FLUS): Guangzhou Metropolitan Area as a case study, Sci. Total Environ., 739, 139899,  
 402 doi:10.1016/j.scitotenv.2020.139899, 2020.
- 403 Liu, J., Kuang, W., Zhang, Z., Xu, X., Qin, Y., Ning, J., Zhou, W., Zhang, S., Li, R., Yan, C., Wu, S., Shi, X., Jiang, N., Yu,  
 404 D., Pan, X. and Chi, W.: Spatiotemporal characteristics, patterns and causes of land use changes in China since the late  
 405 1980s, Dili Xuebao/Acta Geogr. Sin., 69(1), 3–14, doi:10.11821/dlxb201401001, 2014.
- 406 Liu, X., Liang, X., Li, X., Xu, X., Ou, J., Chen, Y., Li, S., Wang, S. and Pei, F.: A future land use simulation model (FLUS)  
 407 for simulating multiple land use scenarios by coupling human and natural effects, Landsc. Urban Plan., 168, 94–116,  
 408 doi:10.1016/j.landurbplan.2017.09.019, 2017.
- 409 Long, Y. and Wu, K.: Shrinking cities in a rapidly urbanizing China, Environ. Plan. A, 48(2), 220–222,  
 410 doi:10.1177/0308518X15621631, 2016.
- 411 Muis, S., Güneralp, B., Jongman, B., Aerts, J. C. J. H. and Ward, P. J.: Flood risk and adaptation strategies under climate  
 412 change and urban expansion: A probabilistic analysis using global data, Sci. Total Environ., 538, 445–457,  
 413 doi:10.1016/j.scitotenv.2015.08.068, 2015.
- 414 Muis, S., Verlaan, M., Winsemius, H. C., Aerts, J. C. J. H. and Ward, P. J.: A global reanalysis of storm surges and extreme  
 415 sea levels, Nat. Commun., 7, 11969, doi:10.1038/ncomms11969, 2016.



- O'Loughlin, F. E., Neal, J., Schumann, G. J. P., Beighley, E. and Bates, P. D.: A LISFLOOD-FP hydraulic model of the middle reach of the Congo, *J. Hydrol.*, 580, doi:10.1016/j.jhydrol.2019.124203, 2020.
- Parris, A., Bromirski, P., Burkett, V., Cayan, D., Culver, M., Hall, J., Horton, R., Knuuti, K., Moss, R., Obeysekera, J., Sallenger, A. and Weiss, J.: Global Sea Level Rise Scenarios for the US National Climate Assessment, NOAA Tech Memo OAR CPO, 1–37, doi:https://scenarios.globalchange.gov/sites/default/files/NOAA\_SLR\_r3\_0.pdf, 2012.
- Pecl, G. T., Araújo, M. B., Bell, J. D., Blanchard, J., Bonebrake, T. C., Chen, I. C., Clark, T. D., Colwell, R. K., Danielsen, F., Evengård, B., Falconi, L., Ferrier, S., Frusher, S., Garcia, R. A., Griffis, R. B., Hobday, A. J., Janion-Scheepers, C., Jarzyna, M. A., Jennings, S., Lenoir, J., Linnetved, H. I., Martin, V. Y., McCormack, P. C., McDonald, J., Mitchell, N. J., Mustonen, T., Pandolfi, J. M., Pettorelli, N., Popova, E., Robinson, S. A., Scheffers, B. R., Shaw, J. D., Sorte, C. J. B., Strugnell, J. M., Sunday, J. M., Tuanmu, M. N., Vergés, A., Villanueva, C., Wernberg, T., Wapstra, E. and Williams, S. E.: Biodiversity redistribution under climate change: Impacts on ecosystems and human well-being, *Science* (80-. ), 355(6332), doi:10.1126/science.aai9214, 2017.
- Ramaswami, A., Russell, A. G., Culligan, P. J., Rahul Sharma, K. and Kumar, E.: Meta-principles for developing smart, sustainable, and healthy cities, *Science* (80-. ), 352, 940–943, doi:10.1126/science.aaf7160, 2016.
- Reckien, D., Salvia, M., Heidrich, O., Church, J. M., Pietrapertosa, F., De Gregorio-Hurtado, S., D'Alonzo, V., Foley, A., Simoes, S. G., Krkoška Lorencová, E., Orru, H., Orru, K., Wejs, A., Flacke, J., Olazabal, M., Geneletti, D., Feliu, E., Vasilie, S., Nador, C., Krook-Riekkola, A., Matosović, M., Fokaides, P. A., Ioannou, B. I., Flamos, A., Spyridaki, N. A., Balzan, M. V., Fülöp, O., Paspaldzhiev, I., Grafakos, S. and Dawson, R.: How are cities planning to respond to climate change? Assessment of local climate plans from 885 cities in the EU-28, *J. Clean. Prod.*, 191, 207–219, doi:10.1016/j.jclepro.2018.03.220, 2018.
- Song, J., Fu, X., Wang, R., Peng, Z.-R. and Gu, Z.: Does planned retreat matter? Investigating land use change under the impacts of flooding induced by sea level rise, *Mitig. Adapt. Strateg. Glob. Chang.*, 23(5), 703–733, doi:10.1007/s11027-017-9756-x, 2018.
- Sosa, J., Sampson, C., Smith, A., Neal, J. and Bates, P.: A toolbox to quickly prepare flood inundation models for LISFLOOD-FP simulations, *Environ. Model. Softw.*, 123, 104561, doi:https://doi.org/10.1016/j.envsoft.2019.104561, 2020.
- Sun, L., Chen, J., Li, Q. and Huang, D.: Dramatic uneven urbanization of large cities throughout the world in recent decades, *Nat. Commun.*, 11(1), 5366, doi:10.1038/s41467-020-19158-1, 2020.
- Tessler, Z. D., Vorosmarty, C. J., Grossberg, M., Gladkova, I., Aizenman, H., Syvitski, J. P. M. and Foufoula-Georgiou, E.: Profiling risk and sustainability in coastal deltas of the world, *Science* (80-. ), 349, 638–643, doi:10.1126/science.aab3574, 2015.
- United Nations: Factsheet: People and oceans., 2017a.
- United Nations: World population prospects., 2017b.



- 448 Vousdoukas, M. I., Mentaschi, L., Voukouvalas, E., Verlaan, M., Jevrejeva, S., Jackson, L. P. and Feyen, L.: Global  
 449 probabilistic projections of extreme sea levels show intensification of coastal flood hazard, *Nat. Commun.*, 9(1), 1–12,  
 450 doi:10.1038/s41467-018-04692-w, 2018.
- 451 Wang, Z., Lai, C., Chen, X., Yang, B., Zhao, S. and Bai, X.: Flood hazard risk assessment model based on random forest, *J.*  
 452 *Hydrol.*, 527, 1130–1141, doi:10.1016/j.jhydrol.2015.06.008, 2015.
- 453 Wing, O. E. J., Sampson, C. C., Bates, P. D., Quinn, N., Smith, A. M. and Neal, J. C.: A flood inundation forecast of Hurricane  
 454 Harvey using a continental-scale 2D hydrodynamic model, *J. Hydrol.* X, 4, 100039,  
 455 doi:https://doi.org/10.1016/j.hydroa.2019.100039, 2019.
- 456 Xian, S., Yin, J., Lin, N. and Oppenheimer, M.: Influence of risk factors and past events on flood resilience in coastal  
 457 megacities: Comparative analysis of NYC and Shanghai, *Sci. Total Environ.*, 610–611, 1251–1261,  
 458 doi:10.1016/j.scitotenv.2017.07.229, 2018.
- 459 Xu, K., Fang, J., Fang, Y., Sun, Q., Wu, C. and Liu, M.: The importance of digital elevation models selection in flood simulation  
 460 and a proposed method to reduce DEM errors: a case study in Shanghai, *Int. J. Disaster Risk Sci.*, (in press), 2021.
- 461 Xu, W. (Ato) and Yang, L.: Evaluating the urban land use plan with transit accessibility, *Sustain. Cities Soc.*, 45, 474–485,  
 462 doi:10.1016/j.scs.2018.11.042, 2019.
- 463 Xu, X., Liu, J., Zhang, Z., Zhou, W., Zhang, S., Li, R., Yan, C., Wu, S. and Shi, X.: A Time Series Land Ecosystem  
 464 Classification Dataset of China in Five-Year Increments (1990–2010), *J. Glob. Chang. Data Discov.*, 1(1), 52–59,  
 465 doi:10.3974/geodp.2017.01.08, 2017.
- 466 Yin, J., Yu, D., Yin, Z., Wang, J. and Xu, S.: Modelling the combined impacts of sea-level rise and land subsidence on storm  
 467 tides induced flooding of the Huangpu River in Shanghai, China, *Clim. Change*, 119(3–4), 919–932, doi:10.1007/s10584-  
 468 013-0749-9, 2013.
- 469 Yin, J., Jonkman, S., Lin, N., Yu, D., Aerts, J., Wilby, R., Pan, M., Wood, E., Bricker, J., Ke, Q., Zeng, Z., Zhao, Q., Ge, J.  
 470 and Wang, J.: Flood Risks in Sinking Delta Cities: Time for a Reevaluation?, *Earth's Futur.*, 8(8),  
 471 doi:10.1029/2020EF001614, 2020.
- 472 Zhai, Y., Yao, Y., Guan, Q., Liang, X., Li, X., Pan, Y., Yue, H., Yuan, Z. and Zhou, J.: Simulating urban land use change by  
 473 integrating a convolutional neural network with vector-based cellular automata, *Int. J. Geogr. Inf. Sci.*, 34(7), 1475–1499,  
 474 doi:10.1080/13658816.2020.1711915, 2020.
- 475 Zhao, L., Song, J. and Peng, Z.-R.: Modeling Land-Use Change and Population Relocation Dynamics in Response to Different  
 476 Sea Level Rise Scenarios: Case Study in Bay County, Florida, *J. Urban Plan. Dev.*, 143(3), 04017012,  
 477 doi:10.1061/(asce)up.1943-5444.0000398, 2017.
- 478 Zhou, L., Dang, X., Sun, Q. and Wang, S.: Multi-scenario simulation of urban land change in Shanghai by random forest and  
 479 CA-Markov model, *Sustain. Cities Soc.*, 55, 102045, doi:10.1016/j.scs.2020.102045, 2020.

<https://doi.org/10.5194/nhess-2021-200> Preprint. Discussion started: 2 July 2021 c  
Author(s) 2021. CC BY 4.0 License.

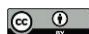

480 Zhou, Q., Leng, G., Su, J. and Ren, Y.: Comparison of urbanization and climate change impacts on urban flood volumes:  
481 Importance of urban planning and drainage adaptation, Sci. Total Environ., 658, 24–33,  
482 doi:<https://doi.org/10.1016/j.scitotenv.2018.12.184>, 2019.

<https://doi.org/10.5194/nhess-2021-200> Preprint. Discussion started: 2 July 2021 c  
Author(s) 2021. CC BY 4.0 License.

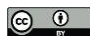

486 Xu, X.: China GDP Spatial Distribution Kilometer Grid Dataset  
[dataset], <http://www.resdc.cn/DOI/doi.aspx?DOIId=33>,

487 2017a.

488 Xu, X.: China Population Spatial Distribution Kilometer Grid Dataset [dataset],

489 <http://www.resdc.cn/DOI/DOI.aspx?DOIId=32>, 2017b.
